# Supplementary material for: Reverse osmosis water desalination plants and environmental impacts
Source: Research Square preprint supplement (doi:10.21203/rs.3.rs-1645047/v1), 2022-05-23
Supplement: Supplementary file 1 [file bd77484fe1cfe4d86bab09c6.xlsx]

## Sheet: tu
ایستگاه	عمق (cm)	نمونه	Pb	Cu	Ni	Cd	Zn	Fe		ایستگاه	عمق (cm)		Pb	Cu	Ni	Cd	Zn	Fe
				mg/l				g/l
1	5-0	1	0.73	0.94	3.24	0.87	4.31	3.42					0.287402	2.3876	8.2296	2.2098	10.9474	8.6868
		2	0.46	0.72	2.77	1.12	3.32	6.58					0.181102	1.8288	7.0358	2.8448	8.4328	16.7132
		3	0.4	0.96	1.83	0.55	5.49	6.05					0.15748	2.4384	4.6482	1.397	13.9446	15.367
	mean		0.53	0.873333	2.61333	0.846667	4.37333	5.35					1.3462	2.21827	6.63787	2.15053	11.1083	13.589
2	5-0	1	0.87	1.39	1.93	0.76	2.4	5.56					0.34252	3.5306	4.9022	1.9304	6.096	14.1224
		2	0.72	0.58	1.06	1.08	0.81	3.71					0.283465	1.4732	2.6924	2.7432	2.0574	9.4234
		3	0.21	0.12	2.39	1.96	1.23	5.86					0.0826772	0.3048	6.0706	4.9784	3.1242	14.8844
	mean		0.6	0.696667	1.79333	1.26667	1.48	5.04333					1.524	1.76953	4.55507	3.21733	3.7592	12.8101
																Station	D (cm)	samole	Pb	Cu	Ni	Cd	Zn	Fe		Pb	Cu	Ni	Cd	Zn	Fe		Station	Pb	Cu	Ni	Cd	Zn	Fe	ایستگاه	Pb	Cu	Ni	Cd	Zn			Pb	Cu
																					mg/l			g/l															g/kg		TU					Ʃtu		tu/Ʃtu
																1	0-5	1	0.65	1.48	2.73	0.96	5.65	10.94		0.255906	0.582677	1.0748	0.377953	2.22441	4.30709		1	0.326772	0.598425	0.985564	0.335958	1.98294	3.75066	1	0.0029176	0.00554097	0.11705	0.015699	0.00731712	0.148525		1.96438	3.73067
																		2	0.5	1.23	1.67	0.54	3.16	6.13		0.19685	0.484252	0.65748	0.212598	1.24409	2.41339		2	0.0826772	0.455381	0.788714	0.69685	1.48425	2.43701	2	0.000738189	0.00421649	0.0936715	0.0325631	0.00547694	0.136666		0.54014	3.08524
																		3	0.72	1.85	3.11	1.06	6.3	11.51		0.283465	0.728346	1.22441	0.417323	2.48031	4.5315		3	0.287402	0.257218	0.338583	0.33727	0.459318	1.43045	3	0.00256609	0.00238165	0.0402117	0.0157603	0.0016949	0.0626146		4.09822	3.80366
																	5-10	1	0.83	2.03	4.19	1.71	5.86	8.11		0.326772	0.598425	0.985564	0.335958	1.98294	3.75066		4	0.374016	0.447507	0.754593	0.404199	1.14698	2.45801	4	0.00333943	0.00414358	0.0896191	0.0188878	0.0042324	0.120222		2.77771	3.4466
																		2	1.02	1.6	3.52	1.33	5.2	6.72									5	0.287402	2.62467	4.2164	2.09127	9.45727	9.9822	5	0.00256609	0.0243025	0.50076	0.0977227	0.0348977	0.660249		0.388654	3.6808
																		3	0.95	2.54	5.59	2.26	8.38	10.94									Control1	1.3462	2.21827	6.63787	2.15053	11.1083	13.589	شاهد 1	0.0120196	0.0205395	0.788345	0.100492	0.0409899	0.962386		1.24894	2.13423
																			0.778333	1.78833	3.46833	1.31	5.75833	9.05833									Control2	1.524	1.76953	4.55507	3.21733	3.7592	12.8101	شاهد 2	0.0136071	0.0163846	0.540982	0.150343	0.0138716	0.735188		1.85084	2.22862
																2	0-5	1	0.17	0.85	1.86	1.11	2.58	3.98		0.0669291	0.334646	0.732283	0.437008	1.01575	1.56693																	1.83841	3.15855
																		2	0.28	1.52	1.49	2.47	5.08	8.59		0.110236	0.598425	0.586614	0.972441	2	3.38189
																		3	0.18	1.1	2.66	1.73	3.65	6		0.0708661	0.433071	1.04724	0.681102	1.43701	2.3622
																	5-10	1	0.21	1.48	2.35	1.06	5.18	5.71		0.0826772	0.455381	0.788714	0.69685	1.48425	2.43701												Pb	Cu	Ni	Cd	Zn
																		2	0.34	2.2	3.62	1.74	0.79	9.27																			TU
																		3	0.31	1.76	3.35	1.54	7.11	7.89																			0.0029176	0.00554097	0.11705	0.015699	0.00731712
																			0.248333	1.485	2.555	1.60833	4.065	6.90667																			0.000738189	0.00421649	0.0936715	0.0325631	0.00547694
																3	0-5	1	0.51	0.6	0.69	0.78	1.09	1.2		0.200787	0.23622	0.271654	0.307087	0.429134	0.472441												0.00256609	0.00238165	0.0402117	0.0157603	0.0016949
																		2	0.62	0.71	0.84	0.95	1.28	4.07		0.244094	0.279528	0.330709	0.374016	0.503937	1.60236												0.00333943	0.00414358	0.0896191	0.0188878	0.0042324
																		3	0.55	0.65	1.05	0.84	1.13	5.63		0.216535	0.255906	0.413386	0.330709	0.444882	2.21654												0.00256609	0.0243025	0.50076	0.0977227	0.0348977
																	5-10	1	0.73	0.82	1	1.12	1.56	8.46		0.287402	0.257218	0.338583	0.33727	0.459318	1.43045												0.0120196	0.0205395	0.788345	0.100492	0.0409899
																		2	0.83	0.96	0.86	1.39	1.72	2.16																			0.0136071	0.0163846	0.540982	0.150343	0.0138716
																		3	0.72	1.21	1.27	1.15	1.76	1.89
																			0.66	0.825	0.951667	1.03833	1.42333	3.90167
																4	0-5	1	0.55	1.03	1.37	0.87	2.04	5.2		0.216535	0.405512	0.53937	0.34252	0.80315	2.04724
																		2	0.66	1.34	2.37	1.3	3.66	5.67		0.259843	0.527559	0.933071	0.511811	1.44094	2.23228
																		3	0.52	1.04	2.01	0.91	3.04	7.86		0.204724	0.409449	0.791339	0.358268	1.19685	3.09449
																	5-10	1	0.95	1.99	2.55	1.63	3.95	6.93		0.374016	0.447507	0.754593	0.404199	1.14698	2.45801
																		2	0.64	1	1.96	1.19	4.53	10.47
																		3	0.56	0.73	1.23	0.87	3.05	9.5
																			0.646667	1.18833	1.915	1.12833	3.37833	7.605
																	0-5	1	0.75	0.35	1.23	0.95	3.81	5.86		0.295276	0.889	3.1242	2.413	9.6774	14.8844
																		2	0.53	0.67	1.49	1.13	4.54	3.8		0.208661	1.7018	3.7846	2.8702	11.5316	9.652
																		3	0.44	2.08	2.26	0.39	2.82	2.13		0.173228	5.2832	5.7404	0.9906	7.1628	5.4102
																	5-10	1	0.73	0.83	2.27	1.9	2.62	11.04		0.287402	2.62467	4.2164	2.09127	9.45727	9.9822
																		2	0.71	1.56	1.8	0.5	5.67	8.81
																		3	1	1.22	1.66	1.98	4.2	11.28
																			0.693333	1.11833	1.785	1.14167	3.94333	7.15333
[truncated: 3 more columns]

## Sheet: C
	Station		Sampe	Pb	Cu	Ni	Cd	Zn	Fe
						mg/kg			g/kg		Pb	Cu	Ni	Cd	Zn	Fe			Pb	Cu	Ni	Cd	Zn	Fe
	1		1	1.65	3.76	6.93	2.44	14.35	27.79		0.649606	1.48031	2.72835	0.96063	5.64961	10.9409		1	1.85	2.39	8.23	2.21	10.95	8.69
			2	1.27	3.12	4.24	1.37	8.03	15.57		0.5	1.22835	1.66929	0.53937	3.16142	6.12992		2	1.17	1.83	7.04	2.84	8.43	16.71
			3	1.83	4.7	7.9	2.69	16	29.24		0.720472	1.85039	3.11024	1.05906	6.29921	11.5118		3	1.02	2.44	4.65	1.4	13.94	15.37
	2		1	0.43	2.16	4.72	2.82	6.55	10.11		0.169291	0.850394	1.85827	1.11024	2.57874	3.98031		1	2.21	3.53	4.9	1.93	6.1	14.12
			2	0.71	3.86	3.78	6.27	12.9	21.82		0.279528	1.51969	1.48819	2.4685	5.07874	8.59055		2	1.83	1.47	2.69	2.74	2.06	9.42
			3	0.46	2.79	6.76	4.39	9.27	15.24		0.181102	1.09843	2.66142	1.72835	3.64961	6		3	0.53	0.3	6.07	4.98	3.12	14.88
	3		1	1.3	1.52	1.75	1.98	2.77	3.05		0.511811	0.598425	0.688976	0.779528	1.09055	1.20079
			2	1.57	1.8	2.13	2.41	3.25	10.34		0.61811	0.708661	0.838583	0.948819	1.27953	4.07087			Pb	Cu	Ni	Cd	Zn	Fe
			3	1.4	1.65	2.67	2.13	2.87	14.3		0.551181	0.649606	1.05118	0.838583	1.12992	5.62992		1	0.728346	0.940945	3.24016	0.870079	4.31102	3.42126
	4		1	1.4	2.62	3.48	2.21	5.18	13.21		0.551181	1.0315	1.37008	0.870079	2.03937	5.20079		2	0.46063	0.720472	2.77165	1.11811	3.3189	6.57874
			2	1.68	3.4	6.02	3.3	9.3	14.4		0.661417	1.33858	2.37008	1.29921	3.66142	5.66929		3	0.401575	0.96063	1.83071	0.551181	5.48819	6.05118
			3	1.32	2.64	5.11	2.31	7.72	19.96		0.519685	1.03937	2.01181	0.909449	3.03937	7.85827		1	0.870079	1.38976	1.92913	0.759843	2.40157	5.55906
	5		1	1.91	0.89	3.12	2.41	9.68	14.88		0.751969	0.350394	1.22835	0.948819	3.81102	5.85827		2	0.720472	0.57874	1.05906	1.07874	0.811024	3.70866
			2	1.35	1.7	3.78	2.87	11.53	9.65		0.531496	0.669291	1.48819	1.12992	4.53937	3.79921		3	0.208661	0.11811	2.38976	1.96063	1.22835	5.85827
			3	1.12	5.28	5.74	0.99	7.16	5.41		0.440945	2.07874	2.25984	0.389764	2.8189	2.12992

## Sheet: Cf
																							Ei						Ri
Station	sample	Pb	Cu	Ni	Cd	Zn	Fe																	Pb	Cu	Ni	Cd	Zn	Low risk	medium Risk
			mg/kg				g/kg																ایستگاه1	5.4386	9.62025	5.68182	24.0566	1.72014	40	80
1	1	0.73	0.94	3.24	0.87	4.31	3.42																ایستگاه2	1.84211	7.34177	4.54545	50.0943	1.28669	40	80
	2	0.46	0.72	2.77	1.12	3.32	6.58																ایستگاه3	4.91228	4.11392	1.95455	24.3396	0.399317	40	80
	3	0.4	0.96	1.83	0.55	5.49	6.05																ایستگاه4	5.08772	7.21519	4.36364	29.1509	0.993174	40	80
2	1	0.87	1.39	1.93	0.76	2.4	5.56																ایستگاه5	5	6.51899	3.77273	23.2075	1.26962	40	80
	2	0.72	0.58	1.06	1.08	0.81	3.71
	3	0.21	0.12	2.39	1.96	1.23	5.86
		0.565	0.785	2.20333	1.05667	2.92667	5.19667
جدول 4-9: غلظت فلزات سنگین در رسوبات در معرض
Station	sample	Pb	Cu	Ni	Cd	Zn	Fe
				mg/kg			g/kg		Station	Pb	Cu	Ni	Cd	Zn	Fe
1	1	0.65	1.48	2.73	0.96	5.65	10.94		1	0.62	1.52	2.5	0.85	5.04	9.53
	2	0.5	1.23	1.67	0.54	3.16	6.13		2	0.21	1.16	2	1.77	3.77	6.19			Station	Pb	Cu	Ni	Cd	Zn	Fe	PLI	PLI zone	0.978826
	3	0.72	1.85	3.11	1.06	6.3	11.51		3	0.56	0.65	0.86	0.86	1.17	3.63			1	1.08772	1.92405	1.13636	0.801887	1.72014	1.83269	1.43154
		0.623333	1.52	2.50333	0.853333	5.03667	9.52667		4	0.58	1.14	1.92	1.03	2.91	6.24			2	0.368421	1.46835	0.909091	1.66981	1.28669	1.19038	1.04694
2	1	0.17	0.85	1.86	1.11	2.58	3.98		5	0.57	1.03	1.66	0.82	3.72	3.93			3	0.982456	0.822785	0.390909	0.811321	0.399317	0.698077	0.589954
	2	0.28	1.52	1.49	2.47	5.08	8.59		ref	0.57	0.79	2.2	1.06	2.93	5.2			4	1.01754	1.44304	0.872727	0.971698	0.993174	1.2	1.08216
	3	0.18	1.1	2.66	1.73	3.65	6											5	1	1.3038	0.754545	0.773585	1.26962	0.755769	0.939061
		0.21	1.15667	2.00333	1.77	3.77	6.19		ایستگاه	Pb	Cu	Ni	Cd	Zn	Fe
3	1	0.51	0.6	0.69	0.78	1.09	1.2		ایستگاه1	1.08772	1.92405	1.13636	0.801887	1.72014	1.83269
	2	0.62	0.71	0.84	0.95	1.28	4.07		ایستگاه2	0.368421	1.46835	0.909091	1.66981	1.28669	1.19038			Station	Pb	Cu	Ni	Cd	Zn	Fe
	3	0.55	0.65	1.05	0.84	1.13	5.63		ایستگاه3	0.982456	0.822785	0.390909	0.811321	0.399317	0.698077			1	1.08772	1.92405	1.13636	0.801887	1.72014	1.83269
		0.56	0.653333	0.86	0.856667	1.16667	3.63333		ایستگاه4	1.01754	1.44304	0.872727	0.971698	0.993174	1.2			2	0.368421	1.46835	0.909091	1.66981	1.28669	1.19038
4	1	0.55	1.03	1.37	0.87	2.04	5.2		ایستگاه5	1	1.3038	0.754545	0.773585	1.26962	0.755769			3	0.982456	0.822785	0.390909	0.811321	0.399317	0.698077
	2	0.66	1.34	2.37	1.3	3.66	5.67											4	1.01754	1.44304	0.872727	0.971698	0.993174	1.2
	3	0.52	1.04	2.01	0.91	3.04	7.86											5	1	1.3038	0.754545	0.773585	1.26962	0.755769
		0.576667	1.13667	1.91667	1.02667	2.91333	6.24333											average	0.891228	1.39241	0.812727	1.00566	1.13379	1.13538
5	1	0.75	0.35	1.23	0.95	3.81	5.86											tr	4.45614	6.96203	4.06364	30.1698	1.13
	2	0.53	0.67	1.49	1.13	4.54	3.8
	3	0.44	2.08	2.26	0.39	2.82	2.13
		0.573333	1.03333	1.66	0.823333	3.72333	3.93

## Sheet: EF
			Station	Pb	Cu	Ni	Cd	Zn	Fe
			mg/kg						g/kg		Station	Pb	Cu	Ni	Cd	Zn
			1	1.58327	3.8608	6.35847	2.16747	12.7931	24.1977		1	6.54304e-05	0.000159552	0.000262771	8.95731e-05	0.000528691
			2	0.5334	2.93793	5.08847	4.4958	9.5758	15.7226		2	3.39257e-05	0.000186861	0.00032364	0.000285945	0.000609047
			3	1.4224	1.65947	2.1844	2.17593	2.96333	9.22867		3	0.000154128	0.000179817	0.000236697	0.00023578	0.000321101
			4	0.646667	1.18833	1.915	1.12833	3.37833	7.605		4	8.50318e-05	0.000156257	0.000251808	0.000148367	0.000444225
			5	1.45627	2.62467	4.2164	2.09127	9.45727	9.9822		5	0.000145886	0.000262935	0.000422392	0.0002095	0.000947413
			Control1	1.3462	2.21827	6.63787	2.15053	11.1083	13.589		Control1	9.90654e-05	0.00016324	0.000488474	0.000158255	0.000817445
			Control2	1.524	1.76953	4.55507	3.21733	3.7592	12.8101		Control2	0.000118969	0.000138136	0.000355585	0.000251157	0.000293457
												0.000109017	0.000150688	0.000422029	0.000204706	0.000555451
				Station	Pb	Cu	Ni	Cd	Zn	EF	EF max	MPI
				1	0.600184	1.05882	0.622637	0.43757	0.951823	0.734208	1.05882	1.04863
				2	0.311196	1.24005	0.766867	1.39686	1.09649	0.962292	1.39686	1.37899
				3	1.4138	1.1933	0.560855	1.1518	0.57809	0.979569	1.4138	1.39963
				4	0.779985	1.03696	0.59666	0.724782	0.799756	0.787628	1.03696	1.0761
				5	1.3382	1.74489	1.00086	1.02342	1.70566	1.36261	1.74489	1.83821
					0.888672	1.25481	0.709576	0.946884	1.02636
					1.33759	1.75979	1.00218	1.36828	1.58369
			Station		نمونه	Pb	Cu	Ni	Cd	Zn	Fe	EF
			1		1	1.85	2.39	8.23	2.21	10.95	8.69
					2	1.17	1.83	7.04	2.84	8.43	16.71
					3	1.02	2.44	4.65	1.4	13.94	15.37
			2		1	2.21	3.53	4.9	1.93	6.1	14.12
					2	1.83	1.47	2.69	2.74	2.06	9.42
					3	0.53	0.3	6.07	4.98	3.12	14.88

## Sheet: Sheet3
	station	Pb	Cu	Ni	Cd	Zn
	1	0.01	0.04	0.76	0.1	0.05
	2	0	0.03	0.6	0.21	0.04
	3	0.01	0.02	0.26	0.1	0.01
	4	0.01	0.01	0.23	0.05	0.01
	5	0.01	0.02	0.5	0.1	0.03
	Control1	0.01	0.02	0.79	0.1	0.04
	Control2	0.01	0.02	0.54	0.15	0.01

## Sheet: PI
					Station	Pb	Cu	Ni	Cd	Zn	Fe	CFAvg	CfMax		Pi
					1	1.15	1.85	1.6	0.98	2.06	1.58	1.53667	1.85	2.89192	1.70057
					2	0.37	1.54	1.18	1.2	1.46	1.2	1.15833	1.54	1.85667	1.3626
					3	0.97	0.86	0.44	0.78	0.51	0.68	0.706667	0.97	0.720139	0.84861
					4	0.96	1.23	0.88	0.84	1.21	1.33	1.075	1.33	1.46226	1.20924
					5	1.01	1.15	0.82	0.85	1.41	1.25	1.08167	1.41	1.57905	1.2566
					CFAvg	0.892	1.326	0.984	0.93	1.33	1.208	1.11167
						1.05908	2.59039	1.76413	1.15245	3.00625	1.97783
					Pi	1.02912	1.60947	1.3282	1.07352	1.73385	1.40635	0
					Station	Pb	Cu	Ni	Cd	Zn	Fe
					1	0.78	1.79	3.47	1.31	5.76	9.06		1	0.78	1.79	3.47	1.31	5.76	9.06
					2	0.25	1.49	2.56	1.61	4.07	6.91		2	0.25	1.49	2.56	1.61	4.07	6.91
					3	0.66	0.83	0.95	1.04	1.42	3.9		3	0.66	0.83	0.95	1.04	1.42	3.9
					4	0.65	1.19	1.92	1.13	3.38	7.61		4	0.65	1.19	1.92	1.13	3.38	7.61
					5	0.69	1.12	1.79	1.14	3.94	7.15		5	0.69	1.12	1.79	1.14	3.94	7.15
					Ref	0.68	0.97	2.17	1.34	2.79	5.74

## Sheet: QTEL
		ایستگاه	Pb	Cu	Ni	Cd	Zn			ایستگاه	Pb	Cu	Ni	Cd	Zn
		mg/kg								mg/kg						QTEL		ایستگاه	QTEL	آستانه خطر
		1	1.58327	3.8608	6.35847	2.16747	12.7931			1	0.688377	0.537716	0.694914	0.0318745	0.10317	2.05605		1	2.05605
		2	0.5334	2.93793	5.08847	4.4958	9.5758			2	0.231913	0.409183	0.556117	0.0661147	0.0772242	1.34055		2	1.34055
		3	1.4224	1.65947	2.1844	2.17593	2.96333			3	0.618435	0.231123	0.238732	0.031999	0.0238978	1.14419		3	1.14419
		4	0.646667	1.18833	1.915	1.12833	3.37833			4	0.281159	0.165506	0.20929	0.0165931	0.0272446	0.699793		4	0.699793
		5	1.45627	2.62467	4.2164	2.09127	9.45727			5	0.633159	0.365552	0.460809	0.0307539	0.0762683	1.56654		5	1.56654
		شاهد 1	1.3462	2.21827	6.63787	2.15053	11.1083			شاهد 1	0.585304	0.308951	0.72545	0.0316255	0.0895828	1.74091		شاهد 1	1.74091
		شاهد 2	1.524	1.76953	4.55507	3.21733	3.7592			شاهد 2	0.662609	0.246453	0.497821	0.0473137	0.0303161	1.48451		شاهد 2	1.48451

## Sheet: Qpel
		station	Pb	Cu	Ni	Cd	Zn			Pb	Cu	Ni	Cd	Zn
		mg/kg									mg/kg				QPEL			Station	QPEL
		1	1.58327	3.8608	6.35847	2.16747	12.7931			0.0141363	0.0357481	0.755162	0.101283	0.0472071	0.953537			1	0.953537
		2	0.5334	2.93793	5.08847	4.4958	9.5758			0.0047625	0.0272031	0.604331	0.210084	0.0353351	0.881716			2	0.881716
		3	1.4224	1.65947	2.1844	2.17593	2.96333			0.0127	0.0153654	0.25943	0.101679	0.0109348	0.400109			3	0.400109
		4	0.646667	1.18833	1.915	1.12833	3.37833			0.00577381	0.0110031	0.227435	0.0527259	0.0124662	0.309404			4	0.309404
		5	1.45627	2.62467	4.2164	2.09127	9.45727			0.0130024	0.0243025	0.50076	0.0977227	0.0348977	0.670685			5	0.670685
		Control1	1.3462	2.21827	6.63787	2.15053	11.1083			0.0120196	0.0205395	0.788345	0.100492	0.0409899	0.962386			Control1	0.962386
		Control2	1.524	1.76953	4.55507	3.21733	3.7592			0.0136071	0.0163846	0.540982	0.150343	0.0138716	0.735188			Control2	0.735188

## Sheet: Sheet2
						ایستگاه		pH	EC (µm/cm)	Turbidity (NTU)	Temp (c0)
						1	میانگین	60/7±11/0	55617.07±	50/7±12/1	33.69±
							انحراف معیار		223/74		2.81			ایستگاه		TDS	TSS	SO4	Na	K	Ca	Mg	SiO2
						2	میانگین	7.64	55527.3	7.31	33.79			1	میانگین	39643	5.99	3733.93	12321.7	276.01	470	1412.33	0.12
							انحراف معیار	0.12	259.43	0.88	2.78				انحراف معیار	991.52	1.06	93.94	708.04	14.27	51.86	70.78	0.01
						3	میانگین	7.66	55605.5	7.23	33.71			2	میانگین	39369	5.45	3722.33	12442.9	273.8	449.2	1467.53	0.12
							انحراف معیار	0.15	249.38	1.03	2.83				انحراف معیار	1203.72	0.69	131.32	646.89	10.55	32.76	89.43	0.01
						4	میانگین	7.65	55484.5	7.26	34.14			3	میانگین	39944.7	5.58	3695.2	12311.8	278.87	435.73	1424.33	0.11
							انحراف معیار	0.21	143.19	0.92	2.79				انحراف معیار	1430.78	0.75	102.56	668.55	12.58	28.93	91.85	0.01
						5	میانگین	7.66	55549.8	7.36	33.89			4	میانگین	39772.5	5.37	3694.92	12058.6	275.14	426.67	1401.92	0.12
							انحراف معیار	0.11	279.99	0.9	2.87				انحراف معیار	1262.1	0.52	111.77	771.04	9.79	19.99	98.88	0.01
						شاهد	میانگین	7.53	55365.2	7.12	33.79			5	میانگین	39936.3	5.34	3646.08	12371.3	272.67	441.75	1434.75	0.11
							انحراف معیار	0.5	245.1	1.01	2.72				انحراف معیار	1316.4	0.49	132.36	947.22	12.05	21.27	94.77	0.01
														شاهد	میانگین	63191	5.52	3698.67	12638.3	279.2	436.33	1384.67	0.11
															انحراف معیار	93191.3	1.34	128.78	587.62	8.72	39.21	64.29	0.01
		pH	EC (µm/cm)	(NTU)	TDS	TSS	SO4	Fe	SiO2	temp
	Mann-Whitney U	98	51	102	108	106.5	10.5	11.5	112.5	70
	Wilcoxon W	218	71	222	228	226.5	130.5	131.5	232.5	190
	Z	-0.6	-2.551	-0.43	-0.18	-0.254	-4.273	-4.217	0	-1.763
	Asymp. Sig. (2-tailed)	0.54	0.011	0.66	0.85	0.8	0	0	1	0.078
	Exact Sig. [2*(1-tailed Sig.)]	.56b	.010b	.683b	.87b	.806b	.000b	.000b	1.000b	.081b
	a. Grouping Variable: group
	b. Not corrected for ties.
